# Supplementary material
Source: publisher figshare collection journal article supplement (https://gsapubs.figshare.com/ndownloader/files/23320838)
Supplement: Supplementary file 1 [file 23320838]

## Sheet: Appendix 7
EVIDENCE FOR MIXED CONTRIBUTION OF MANTLE, LOWER AND UPPER CRUST TO THE GENESIS OF JURASSIC I-TYPE GRANITES FROM MACAO, SE CHINA
Quelhas et al. (GSA Bulletin)
Appendix 7
Mineral/melt partition coefficients used to calculate fractionation vectors
						Reference	Partition coefficients
						Bea et al. (1994)	D(La/Zrn)	1.30
						Bea et al. (1994)	D(Sm/Zrn)	3.79
						Bea et al. (1994)	D(Nd/Zrn)	3.35
						Bea et al. (1994)	D(Gd/Zrn)	9.21
						Bea et al. (1994)	D(Lu/Zrn)	923.00
						Bea et al. (1994)	D(Yb/Zrn)	278.00
						Bea et al. (1994)	D(Th/Zrn)	22.10
						Mahood and Hildreth (1983)	D(La/Aln)	2594.50
						Mahood and Hildreth (1983)	D(Sm/Aln)	866.50
						Mahood and Hildreth (1983)	D(Nd/Aln)	484.00
						Hermann (2002)	D(Gd/Aln)	201.00
						Hermann (2002)	D(Lu/Aln)	86.00
						Mahood and Hildreth (1983)	D(Yb/Aln)	30.75
						Mahood and Hildreth (1983)	D(Th/Aln)	484.00
						Yurimoto et al. (1990)	D(La/Mnz)	3200.00
						Yurimoto et al. (1990)	D(Sm/Mnz)	2859.00
						Yurimoto et al. (1990)	D(Nd/Mnz)	3726.00
						Yurimoto et al. (1990)	D(Gd/Mnz)	2144.00
						Yurimoto et al. (1990)	D(Lu/Mnz)	174.00
						Yurimoto et al. (1990)	D(Yb/Mnz)	273.00
						Stepanov (2012)	D(Th/Mnz)	1294.00
						Fujimaki (1986)	D(La/Ap)	14.50
						Fujimaki (1986)	D(Sm/Ap)	46.00
						Fujimaki (1986)	D(Nd/Ap)	32.80
						Fujimaki (1986)	D(Gd/Ap)	43.90
						Fujimaki (1986)	D(Lu/Ap)	13.80
						Fujimaki (1986)	D(Yb/Ap)	15.40
						Dawson and Hinton (2003)	D(Th/Ap)	2.87
						Prowatke and Klemme (2005)	D(La/Ttn)	1.88
						Prowatke and Klemme (2005)	D(Sm/Ttn)	20.40
						Tiepolo et al. (2002)	D(Nd/Ttn)	15.52
						Prowatke and Klemme (2005)	D(Gd/Ttn)	18.20
						Prowatke and Klemme (2005)	D(Lu/Ttn)	2.38
						Tiepolo et al. (2002)	D(Yb/Ttn)	3.27
						Prowatke and Klemme (2005)	D(Th/Ttn)	0.15
						Bea et al. (1994)	D(La/Grt)	0.10
						Bea et al. (1994)	D(Sm/Grt)	0.45
						Bea et al. (1994)	D(Nd/Grt)	0.20
						Bea et al. (1994)	D(Gd/Grt)	4.95
						Bea et al. (1994)	D(Lu/Grt)	525.00
						Bea et al. (1994)	D(Yb/Grt)	331.00
						Bea et al. (1994)	D(Th/Grt)	0.10
						Sisson (1994)	D(La/Hbl)	1.39
						Sisson (1994)	D(Sm/Hbl)	9.53
						Sisson (1994)	D(Nd/Hbl)	6.95
						Irving and Frey (1978)	D(Gd/Hbl)	10.00
						Irving and Frey (1978)	D(Lu/Hbl)	5.50
						Sisson (1994)	D(Yb/Hbl)	4.96
						Bacon and Druitt (1988)	D(Th/Hbl)	0.16
						Bacon and Druitt (1988)	D(Ba/Hbl)	0.30
						Bacon and Druitt (1988)	D(Sr/Hbl)	0.01
						Bacon and Druitt (1988)	D(Eu/Hbl)	3.20
						Bacon and Druitt (1988)	D(Rb/Hbl)	0.40
						Nash and Crecraft (1985)	D(Ba/Pl)	1.52
						Nash and Crecraft (1985)	D(Sr/Pl)	15.63
						Nash and Crecraft (1985)	D(Eu/Pl)	5.42
						Nash and Crecraft (1985)	D(Rb/Pl)	0.11
						Nash and Crecraft (1985)	D(Ba/Kfs)	11.45
						Nash and Crecraft (1985)	D(Sr/Kfs)	5.40
						Nash and Crecraft (1985)	D(Eu/Kfs)	4.45
						Nash and Crecraft (1985)	D(Rb/Kfs)	1.75
						Bea et al. (1994)	D(Ba/Bt)	23.53
						Bea et al. (1994)	D(Sr/Bt)	0.45
						Bea et al. (1994)	D(Eu/Bt)	0.05
						Bea et al. (1994)	D(Rb/Bt)	6.98
						Abbreviations: Kfs – Alkali feldspar; Pl – plagioclase; Bt – biotite; Hbl – hornblende; Zrn – zircon; Ap – apatite; Ttn – titanite; Grt – garnet; Mnz – monazite; Aln – allanite.
			References
			Arth, J.G., 1976. Behavior of Trace Elements During Magmatic Processes - A Summary of Theoretical Models and Their Applications. J. Res. 4, 41–47.
			Bacon, C.R., Druitt, T.H., 1988. Compositional evolution of the zoned calcalkaline magma chamber of Mount Mazama, Crater Lake, Oregon. Contrib. to Mineral. Petrol. 98, 224–256. doi:10.1007/BF00402114
			Bea, F., Pereira, M.D., Stroh, A., 1994. Mineral/leucosome trace-element partitioning in a peraluminous migmatite (a laser ablation-ICP-MS study). Chem. Geol. 117, 291–312. doi:10.1016/0009-2541(94)90133-3
			Dawson, J.B., Hinton, R.W., 2004. Trace-element content and partitioning in calcite, dolomite and apatite in carbonatite, Phalaborwa, South Africa. Mineral. Mag. 67, 921–930. doi:10.1180/0026461036750151
			Fujimaki, H., 1986. Partition coefficients of Hf, Zr, and REE between zircon, apatite, and liquid. Contrib. to Mineral. Petrol. 94, 42–45. doi:10.1007/BF00371224
			Hermann, J., 2002. Allanite: Thorium and light rare earth element carrier in subducted crust. Chem. Geol. 192, 289–306. doi:10.1016/S0009-2541(02)00222-X
			Irving, A.J., Frey, F.A., 1978. Distribution of trace elements between garnet megacrysts and host volcanic liquids of kimberlitic to rhyolitic composition. Geochim. Cosmochim. Acta 42, 771–787. doi:10.1016/0016-7037(78)90092-3
			Mahood, G., Hildreth, W., 1983. Large partition coefficients for trace elements in high-silica rhyolites. Geochim. Cosmochim. Acta 47, 11–30. doi:10.1016/0016-7037(83)90087-X
			Nash, W.P., Crecraft, H.R., 1985. Partition coefficients for trace elements in silicic magmas. Geochim. Cosmochim. Acta 49, 2309–2322. doi:10.1016/0016-7037(85)90231-5
			Prowatke, S., Klemme, S., 2005. Effect of melt composition on the partitioning of trace elements between titanite and silicate melt. Geochim. Cosmochim. Acta 69, 695–709. doi:10.1016/j.gca.2004.06.037
			Sisson, T.W., 1994. Hornblende-melt trace-element partitioning measured by ion microprobe. Chem. Geol. 117, 331–344. doi:10.1016/0009-2541(94)90135-X
			Stepanov, A.S., 2012. Monazite control on Th, U and REE redistribution during partial melting: experiment and application to the deeply subducted crust.
			Tiepolo, M., Oberti, R., Vannucci, R., 2002. Trace-element incorporation in titanite: Constraints from experimentally determined solid/liquid partition coefficients. Chem. Geol. 191, 105–119. doi:10.1016/S0009-2541(02)00151-1
			Yurimoto, H., Duke, E.F., Papike, J.J., Shearer, C.K., 1990. Are discontinuous chondrite-normalized REE patterns in pegmatitic granite systems the results of monazite fractionation? Geochim. Cosmochim. Acta 54, 2141–2145. doi:10.1016/0016-7037(90)90277-R
